# Supplementary material
Source: publisher figshare collection journal article supplement (https://tandf.figshare.com/ndownloader/files/15167591)
Supplement: Supplementary file 1 [file 15167591]

**SUPPLEMENTARY MATERIAL**

**Decision Tree for NIH Clinical Trial Definition**

1. Does the study involve human participants?
2. Are the participants prospectively assigned to an intervention?
3. Is the study designed to evaluate the effect of the intervention on the participants?
4. Is the effect being evaluated a health-related biomedical or behavioral outcome?

**Table 1.** Journal with most cited articles

| **JOURNAL** | **No. articles** |
| --- | --- |
| Journal of Neuroscience | 8 |
| Stroke | 7 |
| Journal of Neurology Neurosurgery and Psychiatry | 5 |
| Neuropsychologia | 5 |
| Brain Stimulation | 4 |
| Current Biology | 4 |
| Journal of Cognitive Neuroscience | 4 |
| Neurology | 4 |
| Brain | 3 |
| European Journal of Neurology | 3 |
| Nature Neuroscience | 3 |
| NeuroImage | 3 |
| BMC Neuroscience | 2 |
| Brain and Language | 2 |
| Cerebral Cortex | 2 |
| Human Brain Mapping | 2 |
| International Journal of Neuropsychopharmacology | 2 |
| Journal of Neurophysiology | 2 |
| Lancet Neurology | 2 |
| Neuropsychopharmacology | 2 |
| Neurorehabilitation and Neural Repais | 1 |
| Acta Neurologica Scandinavica | 1 |
| Addiction | 1 |
| American Journal of Physical Medicine & Rehabilitation | 1 |
| American Journal of Psychiatry | 1 |
| Annals of Neurology | 1 |
| Appetite | 1 |
| Archives of General Psychiatry | 1 |
| Archives of Neurology | 1 |
| Behavioral Brain Research | 1 |
| Biological Psychiatry | 1 |
| British Journal of Psychiatry | 1 |
| Clinical Journal of Pain | 1 |
| Clinical Neurophysiology | 1 |
| Drug and Alcohol Dependence | 1 |
| European Journal of Neuroscience | 1 |
| Headache | 1 |
| JAMA Psychiatry | 1 |
| Journal of Affective Disorders | 1 |
| Journal of Clinical Psychiatry | 1 |
| Journal of Pain | 1 |
| Journal of Pain and Symptom Management | 1 |
| Journal of Physiology-London | 1 |
| Journal of Rehabilitation Medicine | 1 |
| Neuroreport | 1 |
| Neuroscience Letters | 1 |
| Otolaryngology-Head and Neck Surgery | 1 |
| Plos One | 1 |
| Proceeding of the National Academy of Sciences of the United States of America | 1 |
| Progress in Neuro-Psychopharmacology & Biological Psychiatry | 1 |

**Table 2.** Publication year for TMS and tDCS studies
